# Supplementary material for: Post-mortem correlates of Virchow-Robin spaces detected on in vivo MRI
Source: J Cereb Blood Flow Metab. 2022 May 17;42(7):1224–35. doi: 10.1177/0271678X211067455 (PMC9207491; doi:10.1177/0271678X211067455)
Supplement: sj-xlsx-1-jcb-10.1177_0271678X211067455 - Supplemental material for Post-mortem correlates of Virchow-Robin spaces detected on in vivo MRI [file sj-xlsx-1-jcb-10.1177_0271678X211067455.xlsx]

## Sheet: Sheet1
ID	field strength [T]	sequence	TR [ms]	TE [ms]	FA [°]	Voxelsize [mm]	Scanner
#1-19	1.5	3D-T1	9.3	4.6	8	1x1x1	Philips Ingenia
#22-19	1.5	3D-T1	9.3	4.6	8	1x1x1	Philips Ingenia
#42-19	1.5	3D-T1	9.2	4.6	8	1x1x1	Philips Ingenia
#66-18	3	3D-T1	7.6	3.7	8	1x1x1	Philips Achieva
#95-19	1.5	3D-T1	9.2	4.6	8	1x1x1	Philips Ingenia
#100-19	1.5	3D-T1	9.2	4.6	8	1x1x1	Philips Ingenia
#104-19	1.5	3D-T1	9.3	4.6	8	1x1x1	Philips Ingenia
#112-18	1.5	3D-T1	9.3	4.6	8	1x1x1	Philips Ingenia
#120-19	1.5	3D-T1	9.2	4.6	8	1x1x1	Philips Ingenia
#125-19	1.5	3D-T1	9.3	4.6	8	1x1x1	Philips Ingenia
#140-19	3	3D-T1	4.97	1.86	11	0.9x0.9x0.9	Siemens Vida
#151-18	1.5	3D-T1	9.3	4.6	8	1x1x1	Philips Ingenia
